# Supplementary material
Source: Springer Nature journal article supplement (https://www.springermedizin.de/resource/supplementary/12935_2011_311_MOESM3_ESM.pdf/9540272)
Supplement: MOESM3 [file 9540272]

**A**NHDF normal  
fibroblast cell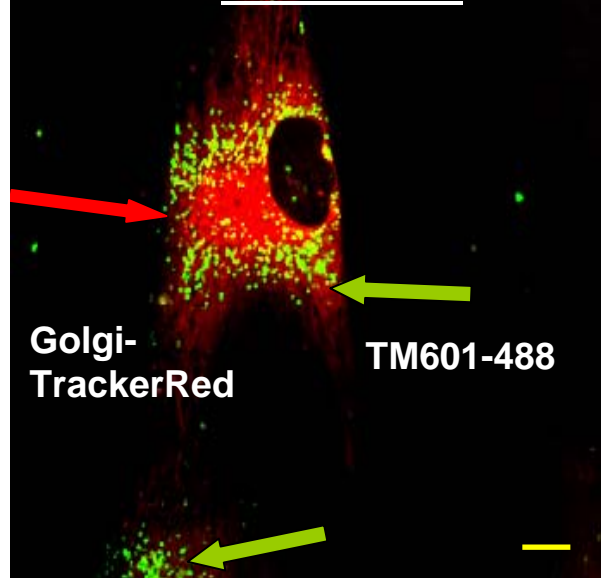**B**U373 glioma cell

Golgi-TrackerRed

TM601-488

This panel shows a U373 glioma cell with Golgi-TrackerRed (red) and TM601-488 (green) staining. The Golgi apparatus is concentrated in a perinuclear region, and TM601-488 is also concentrated in a perinuclear region. A red arrow points to the Golgi-TrackerRed signal, and a green arrow points to the TM601-488 signal. A yellow scale bar is located in the bottom right corner.

**C**A549 lung carcinoma cell

Golgi-TrackerRed

TM601-488

This panel shows an A549 lung carcinoma cell with Golgi-TrackerRed (red) and TM601-488 (green) staining. The Golgi apparatus is concentrated in a perinuclear region, and TM601-488 is also concentrated in a perinuclear region. A red arrow points to the Golgi-TrackerRed signal, and a green arrow points to the TM601-488 signal. A yellow scale bar is located in the bottom right corner.
